# Supplementary material for: Transfer of cardiomyocyte-derived extracellular vesicles to neighboring cardiac cells requires tunneling nanotubes during heart development
Source: PubMed Central journal article supplement (PMC11234280; doi:10.7150/thno.91604), 2024-06-17
Supplement: thnov14p3843s1.pdf [file thnov14p3843s1.pdf]

## **Supplemental Information**

Transfer of cardiomyocyte-derived extracellular vesicles to neighboring cardiac cells  
requires tunneling nanotubes during heart development

Ting Chen et al.

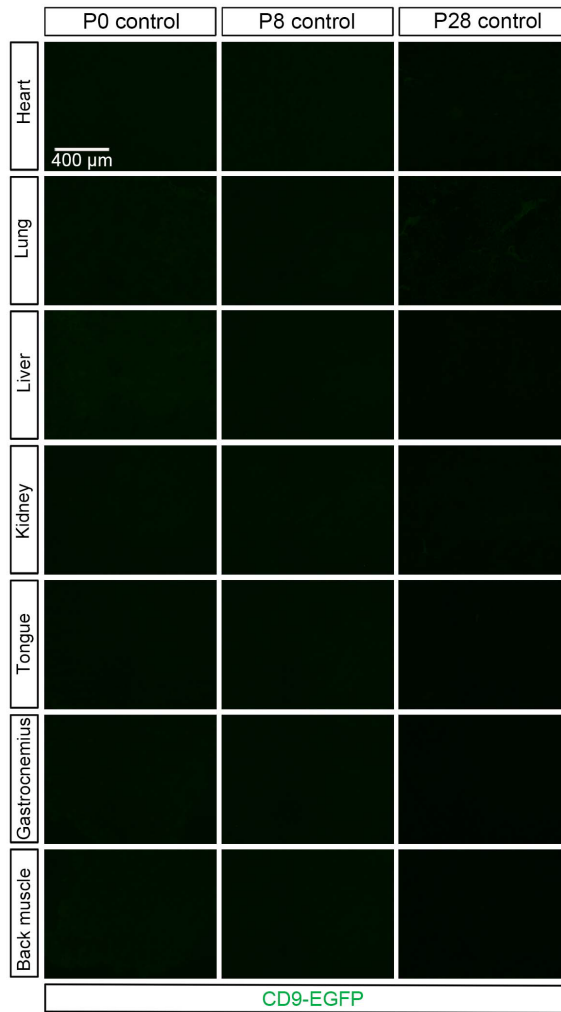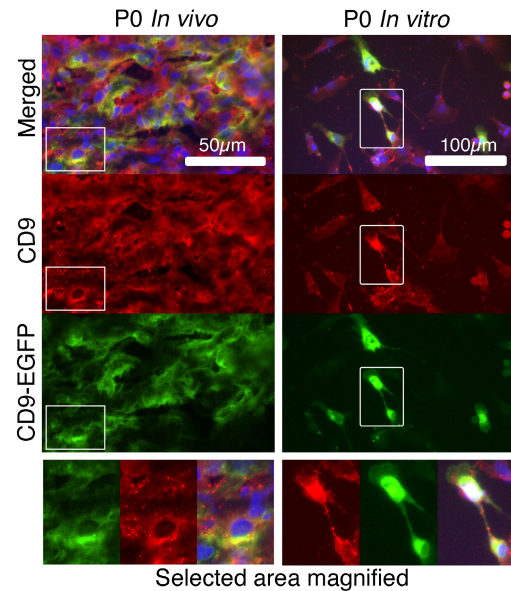

**Figure S1. Direct fluorescence of different organs sections from P0, P8, and P28 *Tnnt2-Cre*; double-floxed inverted *CD9/EGFP*<sup>-</sup> mice and double staining with CD9 and EGFP both *in vitro* and *in vivo*.**

No EGFP signal was detected in different organs sections from P0, P8, and P28 *Tnnt2-Cre*; double-floxed inverted *CD9/EGFP*<sup>-</sup> mice. Double staining with CD9 and EGFP show co-localization both *in vitro* and *in vivo* in *CD9/EGFP*<sup>+</sup> mice.

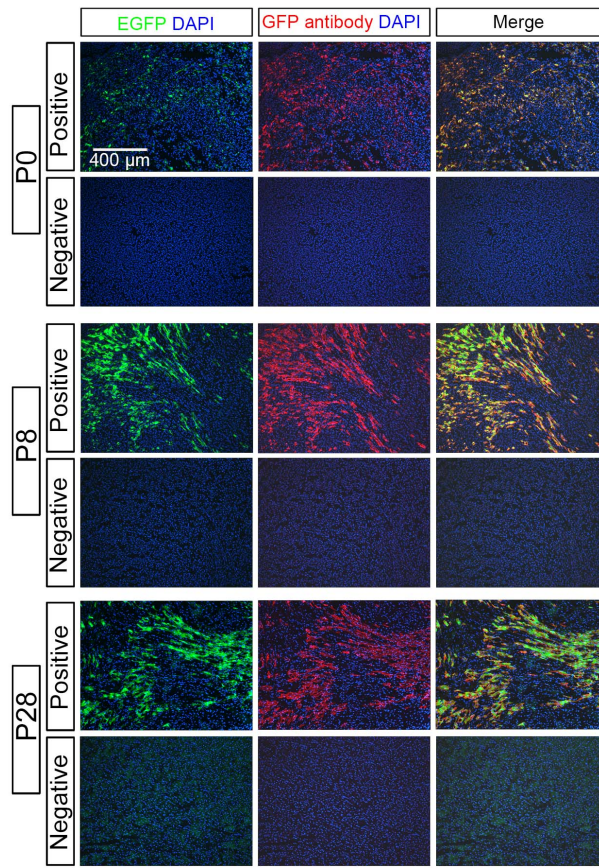

**Figure S2. GFP antibody was used to amplify EGFP signals.**

Immunofluorescence staining of heart sections from P0, P8, and P28 *Tnnt2-Cre*; double-floxed inverted *CD9/EGFP*<sup>+</sup> and <sup>-</sup> mice. The GFP antibody signals (red) were co-localized with the EGFP signals (green). Positive: *Tnnt2-Cre*; double-floxed inverted *CD9/EGFP*<sup>+</sup> mice, Negative: *Tnnt2-Cre*; double-floxed inverted *CD9/EGFP*<sup>-</sup> mice.

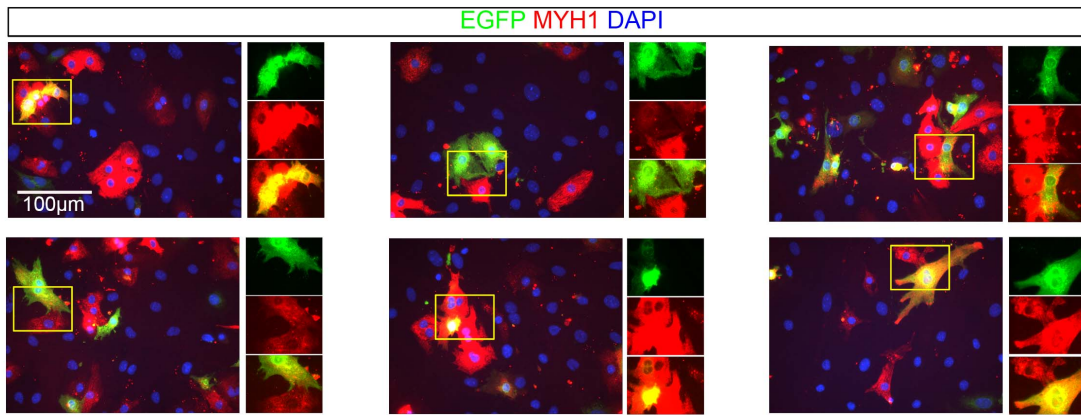

**Figure S3. EGFP-labeled EVs were present in a fraction of cardiomyocytes.**

Immunofluorescence staining of EGFP<sup>+</sup> cardiac cultures for EGFP (green), MYH1 (red), and DAPI (blue) (n = 4).

**Table S1. The pregnant  *$\alpha$ MHC-MerCreMer* mouse exhibited poor outcomes after tamoxifen administration.**

| Mouse ID | Methods                                                  | Outcome    |
|----------|----------------------------------------------------------|------------|
| 1        | Injecting tamoxifen 50 mg/kg body weight/day to pregnant | Stillbirth |
| 2        | mice for 2 consecutive days.                             | Dystocia   |
| 3        | Injecting tamoxifen 20 mg/kg body weight/day to pregnant | Dystocia   |
| 4        | mice for 4 consecutive days from E14-E17.                | Dystocia   |
| 5        |                                                          | Dystocia   |

**Table S2. List of genotyping primers used in qPCR-HRM curve analysis.**

| Gene                 | Primer          | Sequence                  |
|----------------------|-----------------|---------------------------|
| <i>Cre</i>           | Cre Trangene F  | GCGGTCTGGCAGTAAAAACTATC   |
|                      | Cre Trangene R  | GTGAAACAGCATTGCTGTCACCTT  |
| <i>CD9-EGFP</i>      | EGFP F          | AAGCTGACCCTGAAGTTCATCTGC  |
|                      | EGFP R          | CTTGTAGTTGCCGTCGTCCTTGAA  |
| <i>Interleukin-2</i> | Internal Ctrl F | CTAGGCCACAGAATTGAAAGATCT  |
|                      | Internal Ctrl R | GTAGGTGGAAATTCTAGCATCATCC |

**Table S3. List of qRT-PCR primers used in this study.**

| Gene              | Primer       | Sequence               |
|-------------------|--------------|------------------------|
| <i>CD9-EGFP</i>   | PSV 0504     | GCAACGTGCTGGTTATTGTG   |
|                   | PSV 0506     | GTCCAATAGCAAGCACTGCA   |
| <i>Beta-actin</i> | Beta-actin F | GCTGTATTCCCCTCCATCGTG  |
|                   | Beta-actin R | CACGGTTGGCCTTAGGGTTCAG |
| <i>RPL13A</i>     | RPL13A F     | CGAAGATGGCGGAGGGGCAG   |
|                   | RPL13A R     | ACCACCACCTCCGGCCCAG    |

**Table S4. List of antibodies used in this study.**

| Antibody                                | Manufacturer, catalog #              | Host species       | Dilution                       |
|-----------------------------------------|--------------------------------------|--------------------|--------------------------------|
| GFP                                     | Abcam (Cat. no.: ab290)              | Rabbit             | 1:500 (IHC, ICC, Flow)         |
| GFP                                     | Abcam (Cat. no.: ab13970)            | Chicken            | 1:500 (IHC)                    |
| MYH1                                    | DSHB (Clone MF20)                    | Mouse              | 1:200 (IHC, ICC), 1:300 (Flow) |
| GFP                                     | GeneTex(Cat. no.: GTX113617)         | Rabbit             | 1:1000 (WB)                    |
| CD31                                    | BD Pharmingen (Cat. no.: 553370)     | Rat                | 1:50 (IHC)                     |
| Vimentin                                | Abcam (Cat. no.: ab45939)            | Rabbit             | 1:500 (IHC)                    |
| Phalloidin                              | Invitrogen (Cat. no.: A30107)        | Amanita phalloides | 1:800 (IHC)                    |
| Connexin 43                             | Sigma-Aldrich (Cat. no.: SAB4200730) | Mouse              | 1:250 (IHC)                    |
| Donkey anti-Rabbit IgG, Alexa Fluor 488 | Invitrogen (Cat. no.: A-21206)       | Donkey             | 1:200 (IHC, ICC, Flow)         |
| Goat anti-Chicken IgY, Alexa Fluor 488  | Invitrogen (Cat. no.: A-11039)       | Goat               | 1:200 (IHC)                    |
| Donkey anti-Rabbit IgG, Alexa Fluor 555 | Invitrogen (Cat. no.: A-31572)       | Donkey             | 1:200 (IHC)                    |
| Donkey anti-Mouse IgG, Alexa Fluor 555  | Invitrogen (Cat. no.: A-31570)       | Donkey             | 1:200 (IHC, ICC, Flow)         |
| Goat anti-Rat IgG, Alexa Fluor 555      | Invitrogen (Cat. no.: A-21434)       | Goat               | 1:200 (IHC)                    |
| Donkey anti-Mouse IgG, Alexa Fluor 647  | Invitrogen (Cat. no.: A-31571)       | Donkey             | 1:200 (Flow)                   |
| Goat Anti-Rabbit Immunoglobulins/HRP    | Dako (Cat. no.: P0448)               | Goat               | 1:2000 (WB)                    |



**Movie S1. Time-lapse microscopic imaging of tunneling nanotubes linking EGFP<sup>+</sup> cardiomyocyte with a recipient cell of EGFP<sup>-</sup> origin.**

EGFP signals appeared along the nanotube and at the junction of the recipient cell.
